# Supplementary material for: The Skaergaard trough layering: sedimentation in a convecting magma chamber
Source: PubMed Central journal article supplement (PMC6560677; doi:10.1007/s00410-018-1466-1), 2018-04-25
Supplement: 410_2018_1466_MOESM1_ESM.pdf [file 410_2018_1466_MOESM1_ESM.pdf]

*EBSD and SEM settings*

| EBSD settings                           |               | SEM Settings     |                       |
|-----------------------------------------|---------------|------------------|-----------------------|
| Background (frames)                     | 64            | system           | Philips XL30 SFEG SEM |
| Binning                                 | 4 x 4         |                  |                       |
| Gain                                    | 10            |                  |                       |
| Hough resolution                        | 60            | Acc Voltage (kV) | 20                    |
| Band detection (min/max)                | 6/7           | working sitance  | 20                    |
| Noise reduction - wild spike'           | yes           | Spot size        | 5                     |
| n Neighbour zero solution extrapolation | 5             | Aperature        | 3                     |
| Kuwahara Filter                         | 3 x 3 / 5°/1° | Tilt             | 70°                   |

Mean Angular distribution

| Phases               | SK11-12A | SK11-12B | SK11-12C | SK11-13NA | SK11-14B | SK11-14C | F8C1  | F8C2A | F8C2B | F8C3 | F8C5  |
|----------------------|----------|----------|----------|-----------|----------|----------|-------|-------|-------|------|-------|
| Plagioclase          | 0.78     | 0.76     | 0.77     | 0.78      | 0.87     | 0.78     | 0.79  | 0.82  | 0.8   | 0.74 | 0.8   |
| Olivine              | 0.68     | 0.72     | 0.84     | 0.7       | 0.84     | 0.7      | 0.6   | 0.71  | 1.01  | 1.04 | 0.68  |
| Clinopyroxene        | 0.78     | 1.16     | 0.77     | 0.76      | 0.84     | 0.76     | 0.7   | 0.75  | 0.76  | 0.74 | 0.77  |
| Orthopyroxen         | n/a      | 0.98     | 1.7      | 1.3       | 1.3      | n/a      | 0.84  | 1.02  | 1.5   | 0.88 | 0.85  |
| Ilmenite             | 0.74     | 0.7      | 0.69     | 0.77      | 0.8      | 0.71     | 0.7   | 0.71  | 0.73  | 0.7  | 0.7   |
| Magnetite            | 0.7      | 0.78     | 0.68     | 0.8       | 0.83     | 0.72     | 0.75  | 0.76  | 0.89  | 0.75 | 0.76  |
| <i>Zero Solution</i> | 61.8     | 49.2     | 34.9     | 30.65     | 35.8     | 51.2     | 18.89 | 59.9  | 50.57 | 43.8 | 40.15 |
| Step size (µm)       | 20       | 20.25    | 20       | 20        | 20       | 20       | 20    | 20    | 20.25 | 20   | 20    |

*References for the matching units*

|               |                                                  |
|---------------|--------------------------------------------------|
| Plagioclase   | American Mineralogist, (1990) vol 75. pp 150-162 |
| Olivine       | Forsterite.cry (Aztec Database)                  |
| Clinopyroxene | Diopside.cry (Aztec Database)                    |
| Orthopyroxene | Enstatite.cry (Aztec Database)                   |
| Ilmenite      | Phys. Chem. Miner. (1995) col 22, 251-258        |
| Magnetite     | J.Appl. Crystallogr. 1998) vol. 31 718-725       |
